# Supplementary material for: A Mutation-Agnostic EP2–cAMP–Driven Strategy Restores Ciliogenesis and Retinal Function in Ciliopathies
Source: Research Square preprint supplement (doi:10.21203/rs.3.rs-8000675/v1), 2025-12-05
Supplement: Supplementary file 1 [file f1d79cf3696194364273628c.docx]

**A Mutation-Agnostic EP2–cAMP–Driven Strategy Restores Ciliogenesis and Retinal Function in Ciliopathies.**

France de Malglaive1,2,7, Iris Barny2,7, Solène Revy2,8, Cathy Obringer3,8, Lucie Menguy4, Shahd Machroub2, Lucas Fares-Taie1, Ema Cano1, Nicolas Goudin5, Amandine Viau4, Tania Attie-Bittach6, Josseline Kaplan1, Alexandre Benmerah4, Isabelle Perrault1, Luis Briseno-Roa2, Sophie Saunier4,9, Hélène Dollfus3,9✉, Jean-Michel Rozet1,9✉,Jean-Philippe Annereau2,9

**Supplemental Material**

**
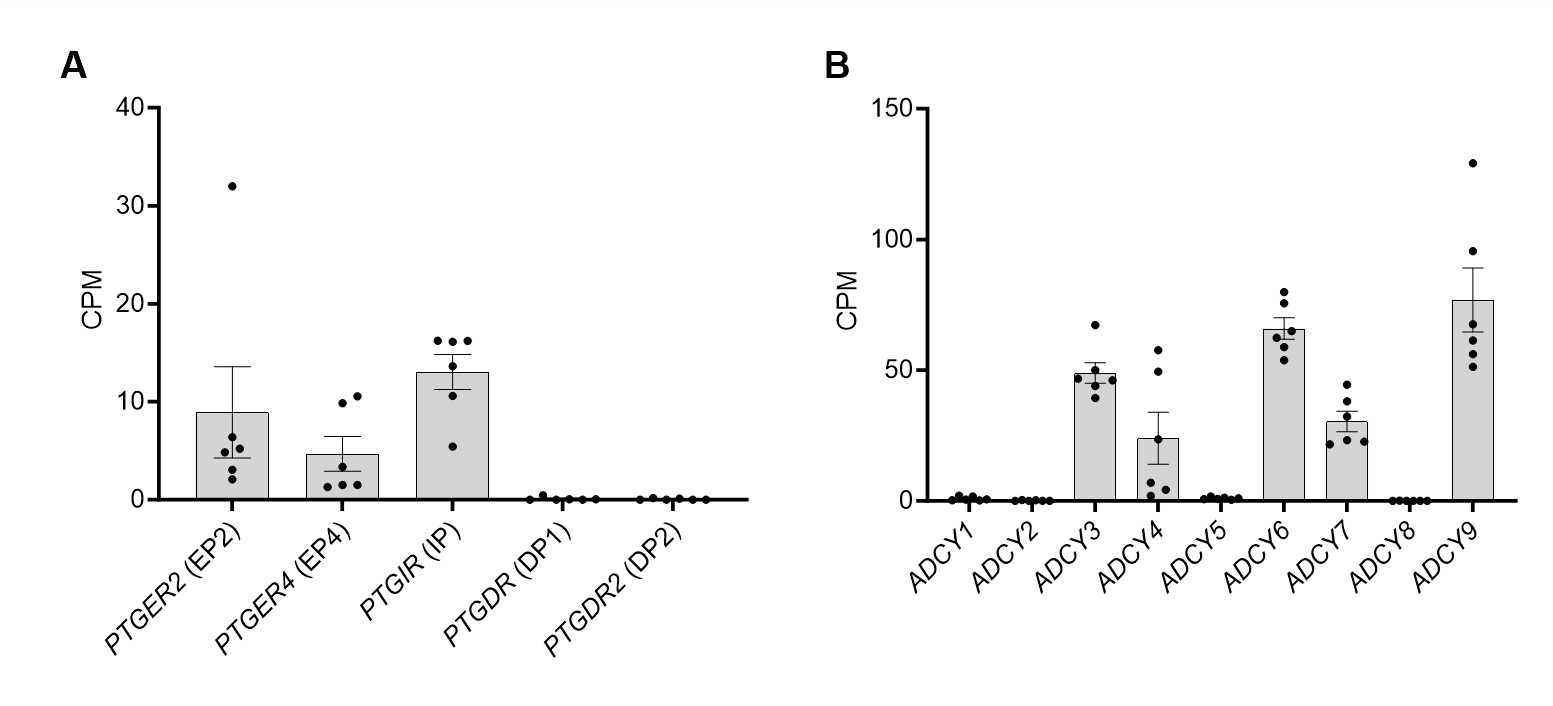
**

**Supplemental Figure 1. Relative expression of prostanoid receptors involved in cAMP signaling (A) and adenylyl cyclases (*ADCY*) (B) in control fibroblasts.** Gene expression levels given as counts per million (CPM) were assessed using publicly available RNA-seq datasets from control human skin fibroblasts (S-BSST1762). Each point represents a biological replicate (n = 6), and the bars indicate the mean ± SEM.

**
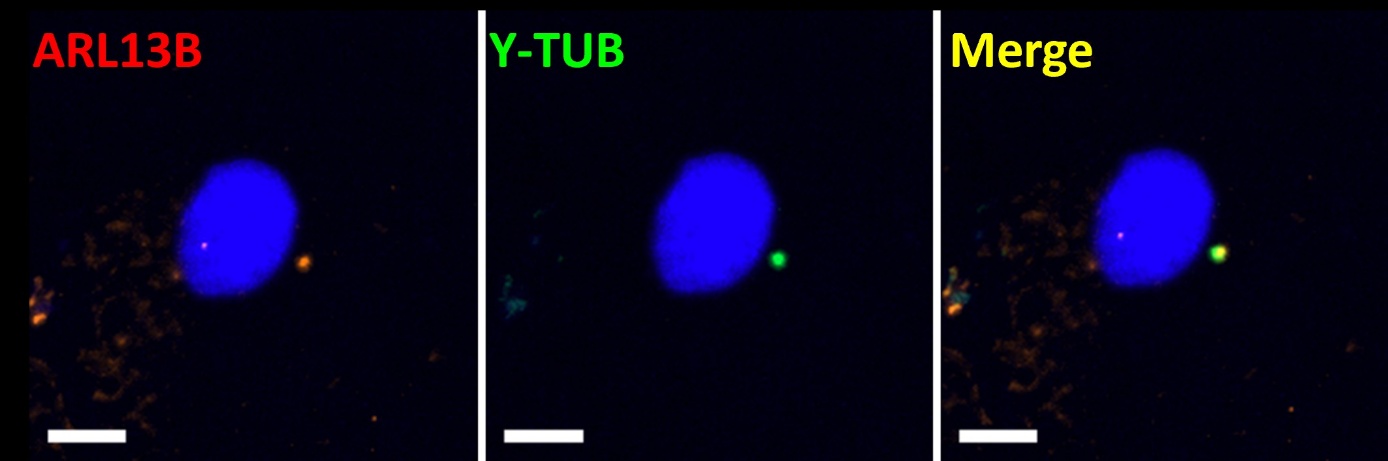
**

**Supplemental Figure 2. Centrosomal colocalization of ARL13B and γ-tubulin in CEP290-Meckel (P5) fibroblasts.** Representative immunocytochemistry images of serum-starved fibroblasts from the poorly ciliated *CEP290*-Meckel patient (P5) showing a foci of colocalization between ARL13B (ciliary membrane, red) and γ-tubulin (basal body, green). These colocalized signals indicate a basal body bearing ciliary vesicle in the cell lacking fully formed cilia. The nucleus is counterstained with DAPI (blue). Scale bars: 10 µm.

**
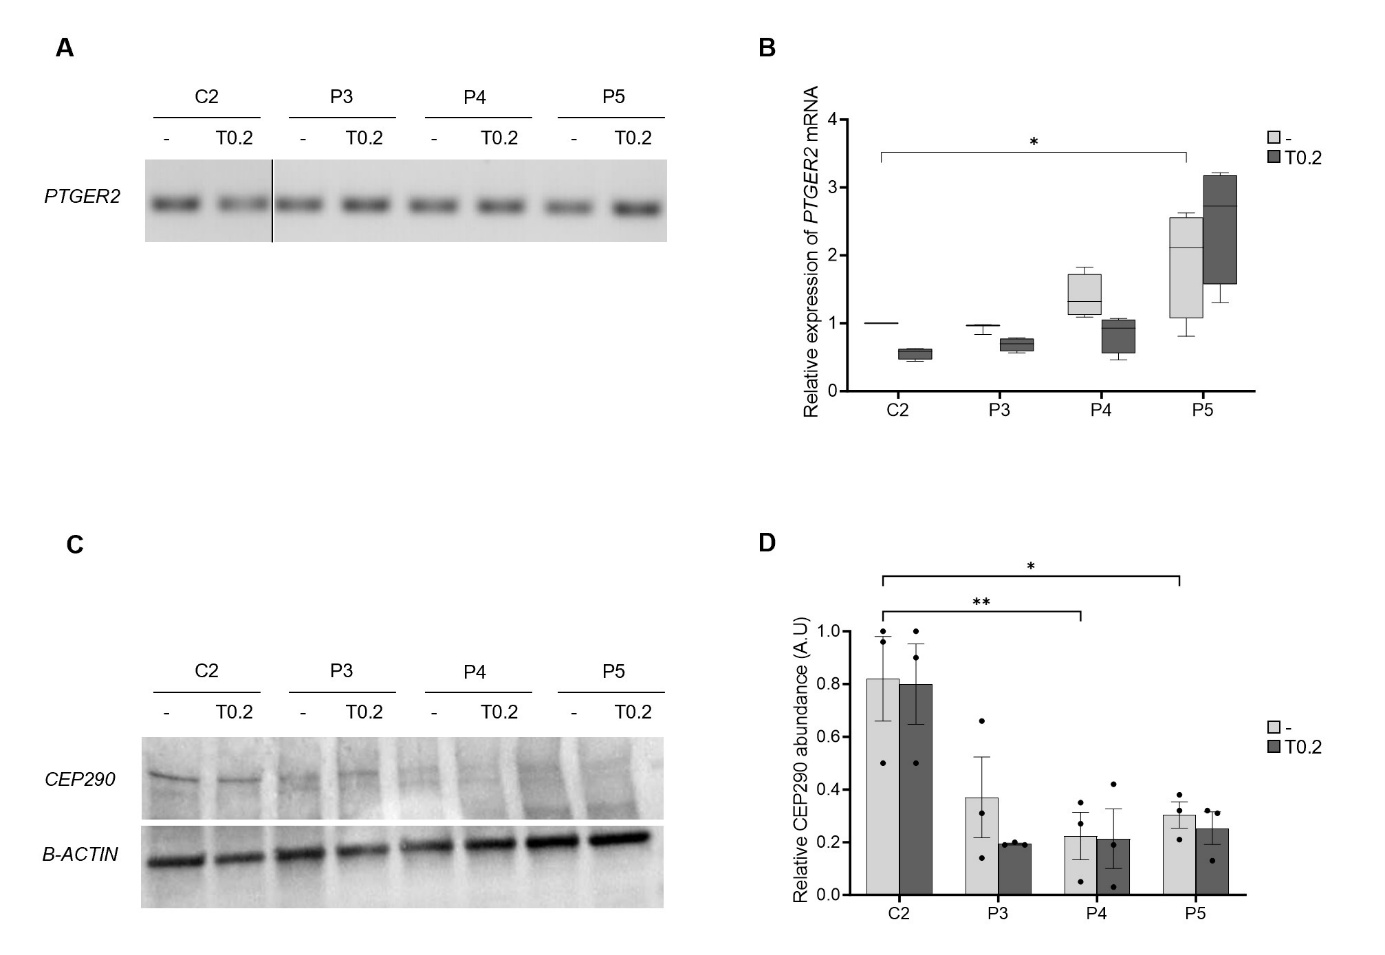
**

**Supplemental Figure 3. Effect of taprenepag on *PTGER2* mRNA and CEP290 protein levels in control and *CEP290*-mutant fibroblasts.** (**A**) End-point PCR detection of *PTGER2* (encoding the EP2 receptor) in control (C2) and mutant fibroblasts (P3, P4, P5) following 24-hour exposure to DMSO (–) or 0.2 µM taprenepag (T0.2) under serum starvation. (**B**) Relative *PTGER2* transcript levels in the same cell lines and conditions, as determined by RT-qPCR; data were normalized to *GUSB* and *RPLP0*. Data were collected from ≥ 3 independent experiments. Statistical analysis involved an ordinary two-way ANOVA followed by a Tukey multiple comparison test. * p < 0.05. (**C**) Western blot detection of CEP290 and β-actin in control and mutant fibroblasts under the same conditions. (**D**) Quantification of CEP290 protein levels normalized to β-actin from (**C**). Bars represent mean ± SEM from three independent experiments. Statistical analysis was performed using two-way ANOVA followed by Sidak multiple comparisons test: ** for p < 0.01 and * for p < 0.05.


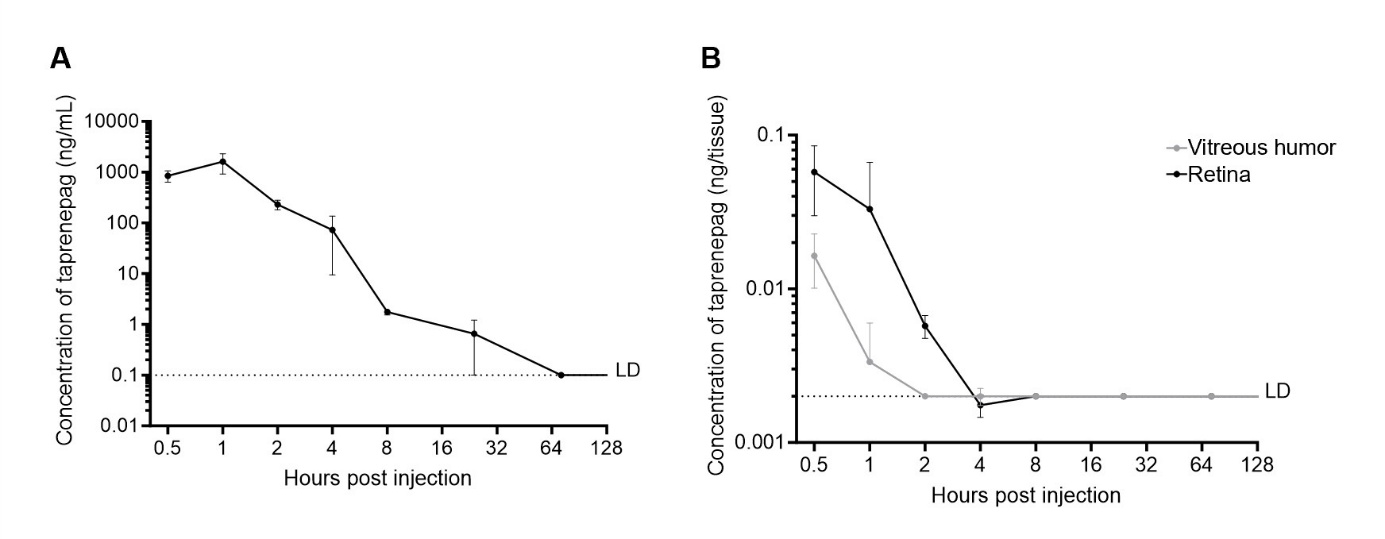


**Supplemental Figure 4. Measurement of taprenepag levels in plasma and ocular tissues following a single intraperitoneal injection of 8mg/kg taprenepag in WT Mice.** Taprenepag concentration (ng/mL) over time post-injection in (**A**) the plasma and (**B**) the retina (dark) and vitreous humor (light grey) of WT mice. Bars represent the mean ± SEM from 4 mice. LD denotes the limit of detection.

**Supplemental Table 1. Taprenepag and cAMP analogs differentially enhance cilia formation and axonemal elongation in control and *CEP290*-mutant fibroblasts. (A)** Quantification of cilia incidence and length in control (C2) and patient-derived fibroblasts (P3–P5) under basal conditions (DMSO) or after stimulation with taprenepag (0.2 µM) or forskolin (25 µM). Data are expressed as mean ± SD or ± SEM as indicated. “Gain from baseline” represents the percentage increase relative to DMSO. Statistical comparisons were performed using Two-way ANOVA with Tukey tests. **(B)** Cilia incidence and length in control (C2) and patient-derived fibroblasts (P3–P4) under basal conditions (water) or after treatment with cAMP analogs: 6-Bnz-cAMP (50 µM), 8-Br-cAMP (500 µM), or db-cAMP (500 µM). “Gain from baseline” indicates percentage increase relative to vehicule (water) condition. Statistical significance was assessed by Two-way ANOVA with Dunnett test. FKS: forskolin;

| **A** | **Baseline (DMSO)** | | | **Taprenepag (T) 0.2M** | | | | **Forskolin (F) 25M** | | | | **Gain F vs T** |
| --- | --- | --- | --- | --- | --- | --- | --- | --- | --- | --- | --- | --- |
| **Cell line** | **Incidence (%)** | **± SD** | **± SEM** | **Incidence (%)** | **± SD** | **± SEM** | **Gain ± SEM (%)** | **Incidence (%)** | **± SD** | **± SEM** | **Gain ± SEM (%)** | **P value** |
| C2 | 79.7 | 13.7 | 3.4 | 89.1 | 7.5 | 2.0 | 11.7±4.0; p = 0.1487 | 81.6 | 17.2 | 4.3 | 2.4±5.5; p=0.9183 | 0.2952 |
| P3 | 70.0 | 15.8 | 3.9 | 81.1 | 16.3 | 4.1 | 15.8±5.7; p=0.0591 | 81.4 | 11.0 | 2.9 | 16.2±4.9; p= 0.0627 | 0.9984 |
| P4 | 50.4 | 11.5 | 2.9 | 63.6 | 11.1 | 2.8 | 26.2±4.0; p=0.0189 | 64.8 | 11.5 | 3.1 | 28.7±4.2; p =0.0119 | 0.9653 |
| P5 | 13.0 | 4.7 | 1.2 | 33.0 | 22.6 | 5.6 | 154.3±5.8 p=0.0002 | 26.7 | 9.2 | 2.4 | 106.0±2.7; p=0.0174 | 0.4091 |
| **Cell line** | **Length (µm)** | **± SD** | **± SEM** | **Length (µm)** | **± SD** | **± SEM** | **Gain ± SEM (%)** | **Length (µm)** | **± SD** | **± SEM** | **Gain ± SEM (%)** | **P value** |
| C2 | 3.72 | 0.46 | 0.15 | 4.38 | 0.42 | 0.14 | 17.7±0.20 ; p=0.0472 | 4.70 | 0.31 | 0.10 | 26.3±0.18; p=0.0015 | 0.4874 |
| P3 | 3.37 | 0.47 | 0.15 | 3.59 | 0.44 | 0.15 | 6.4±0.21 p=0.7093 | 4.13 | 0.45 | 0.14 | 22.7±0.21; p=0.0137 | 0.1165 |
| P4 | 4.96 | 0.52 | 0.16 | 5.17 | 0.51 | 0.17 | 4.3±0.24 p=0.7175 | 5.49 | 0.36 | 0.12 | 10.8±0.20; p=0.1278 | 0.4850 |
| P5 | 5.12 | 0.98 | 0.31 | 4.68 | 1.03 | 0.34 | -8.6±0.46 p=0.2487 | 4.58 | 0.68 | 0.23 | –10.6±0.39; p=0.1210 | 0.9266 |

| **B** | **Baseline (Water)** | **6Bnz-cAMP 50µM** | | **8-Br-cAMP 500 µM** | | **db-cAMP 500 µM** | |
| --- | --- | --- | --- | --- | --- | --- | --- |
| **Cell line** | **Incidence±SD (%)** | **Incidence±SD (%)** | **Gain (%)** | **Incidence±SD (%)** | **Gain (%)** | **Incidence±SD (%)** | **Gain (%)** |
| C2 | 79.7±14.0 | 83.5±13.0 | 4.8; p=0.8731 | 88.1±6.4 | 10.5; p = 0.2561 | 87.0±5.5 | 9.1; p=0.3168 |
| P3 | 66.7±10.4 | 77.8±8.6 | 16.7; p=0.0378 | 74.8±9.2 | 12.2; p = 0.2113 | 77.5±7.9 | 16.3; p= 0.0448 |
| P4 | 56.2±13.5 | 73.5±13.0 | 30.9; p=0.0002 | 76.2±8.7 | 35.7; p < 0.0001 | 79.0±6.9 | 40.7; p < 0.0001 |
| **Cell line** | **Length±SD (µm)** | **Length±SD(µm)** | **Gain (%)** | **Length±SD (µm)** | **Gain (%)** | **Values ± SD (µm)** | **Gain (%)** |
| C2 | 4.45±1.02 | 4.78±0.32 | 7.4; p=0.8405 | 5.3 ±0.26 | 19.1; p = 0.0936 | 5.28±0.37 | 18.6; p = 0.0703 |
| P3 | 4.78±0.58 | 4.91±0.29 | 2.7; p=0.9978 | 5.30±0.44 | 10.9; p = 0.4355 | 5.06±0.34 | 5.9; p = 0.9066 |
| P4 | 5.06±0.95 | 5.55±0.40 | 9.7; p=0.4913 | 6.39±0.24 | 26.4; p = 0.0006 | 5.91±0.38 | 16.8; p = 0.0578 |

**Supplemental Table 2. Taprenepag enhances cilia Incidence and length in fibroblasts from patients with *BBS1* and *BBS10* mutations.** Quantification of cilia incidence and axonemal length in fibroblasts derived from *BBS1* (P6, P7) and *BBS10* (P8, P9) patients under basal conditions (vehicle, DMSO) and following stimulation with taprenepag (0.2 µM). Data are presented as mean ± SD or ± SEM as indicated. “Gain from baseline” represents the percentage increase relative to DMSO-treated cells. Statistical analysis was performed using unpaired One-way ANOVA with Tukey tests; all comparisons showed p < 0.0001.

|  | **Baseline (DMSO)** | | | | **Taprenepag 0.2M** | | | |  |
| --- | --- | --- | --- | --- | --- | --- | --- | --- | --- |
| **Cell line** | **Incidence (%)** | **± SD %** | **± SEM** | **Incidence (%)** | | **± SD** | **± SEM** | **Gain ± SEM (%)** | |
| P6 | 50.7 | 1.65 | 0.46 | 56.8 | | 2.49 | 0.69 | 12.0 ± 0.83; p<0.0001 | |
| P7 | 53.8 | 2.30 | 0.64 | 61.2 | | 2.20 | 0.61 | 13.7 ± 0.88; p<0.0001 | |
| P8 | 62.7 | 2.25 | 0.62 | 70.2 | | 2.09 | 0.58 | 12.0 ± 0.85; p<0.0001 | |
| P9 | 64.8 | 2.94 | 0.82 | 75.1 | | 1.61 | 0.45 | 15.8 ± 0.93; p<0.0001 | |
| **Cell line** | **Length (µm)** | **± SD** | **± SEM** | **Length (µm)** | | **± SD** | **± SEM** | **Gain ± SEM (%)** | |
| P6 | 4.25 | 0.25 | 0.04 | 5.47 | | 0.69 | 0.10 | 28.8 ± 0.10; p<0.0001 | |
| P7 | 4.28 | 0.35 | 0.05 | 5.09 | | 0.44 | 0.06 | 18.8 ± 0.08; p<0.0001 | |
| P8 | 5.19 | 0.32 | 0.05 | 6.45 | | 0.69 | 0.10 | 24.3 ± 0.11; p<0.0001 | |
| P9 | 5.01 | 0.43 | 0.06 | 5.81 | | 0.54 | 0.08 | 16.1 ± 0.10; p<0.0001 | |
